# Supplementary material for: SARS-CoV-2 NSP13 interacts with TEAD to suppress Hippo-YAP signaling
Source: bioRxiv preprint, doi:10.1101/2023.11.30.569413, version 3 (2025-06-19)
Supplement: Supporting data values [file 569413_file02.xlsx]

## Sheet: Figure 2A
Control	Flag-YAP 100ng	plus Lats2 WT 200ng	plus Lats2 KR 200ng	plus NSP2 400ng	plus NSP4 400ng	plus NSP5 400ng	plus NSP6 400ng	plus NSP7 400ng	plus NSP8 400ng	plus NSP9 400ng	plus NSP10 400ng	plus NSP12 400ng	plus NSP13 400ng	plus NSP15 400ng
0.91	532.93	254.91	528.62	483.68	440.15	406.7	663.34	457.26	565.48	403	455.72	543.29	112.64	444.14
0.84	496.34	239.32	600.3	578.39	491.21	573.81	624.37	459.37	527.98	404.37	578.85	676.2	107.76	492.08
1.25	481.43	231.06	501.91	551.45	430.41	538.75	502.44	499.67	513.89	487.66	533.49	665.01	181.31	509.84

## Sheet: Figure 2B
Control	YAP 5SA 50 ng	+NSP13 20 ng	+NSP13 100 ng	+LATS2 WT 200 ng	+LATS2 KR 200 ng
0.71	70.04	38.28	20.9	62.1	63.64
0.84	56.3	30.04	17.76	58.87	54.24
1.45	51.09	26.76	15.28	56.91	64.33

## Sheet: Figure 2D
Mouse	Time point	MCM/WT; CCR2+/-	MCM/WT; CCR2-/-	MCM/YAP 5SA; CCR2+/-	MCM/YAP 5SA; CCR2-/-
MCM/WT; GFP 1	21	0
MCM/WT; GFP 2	21	0
MCM/WT; GFP 3	21	0
MCM/WT; GFP 4	21	0
MCM/WT; GFP 5	21	0
MCM/WT; GFP 6	21	0
MCM/WT; NSP13 1	21		0
MCM/WT; NSP13 2	21		0
MCM/WT; NSP13 3	21		0
MCM/WT; NSP13 4	21		0
MCM/WT; NSP13 5	21		0
MCM/WT; NSP13 6	21		0
MCM/YAP 5SA; GFP 1	8			1
MCM/YAP 5SA; GFP 2	8			1
MCM/YAP 5SA; GFP 3	10			1
MCM/YAP 5SA; GFP 4	10			1
MCM/YAP 5SA; GFP 5	14			1
MCM/YAP 5SA; GFP 6	17			1
MCM/YAP 5SA; GFP 7	21			0
MCM/YAP 5SA; GFP 8	21			0
MCM/YAP 5SA; GFP 9	21			0
MCM/YAP 5SA; GFP 10	21			0
MCM/YAP 5SA; NSP13 1	8				1
MCM/YAP 5SA; NSP13 2	17				1
MCM/YAP 5SA; NSP13 3	21				0
MCM/YAP 5SA; NSP13 4	21				0
MCM/YAP 5SA; NSP13 5	21				0
MCM/YAP 5SA; NSP13 6	21				0
MCM/YAP 5SA; NSP13 7	21				0
MCM/YAP 5SA; NSP13 8	21				0
MCM/YAP 5SA; NSP13 9	21				0
MCM/YAP 5SA; NSP13 10	21				0
Note	0	survive
	1	die

## Sheet: Figure 2E
	MCM + GFP								MCM + NSP13								YAP 5SA + GFP								YAP 5SA + NSP13
Day 4	53.7649	49.5981	62.2549	63.2727	61.0877	57.3651			57.6638	63.0487	56.5777	54.2609	56.9916	45.3841			63.0371	50.9796	57.1362	56.6206	56.0328	58.6063			67.0729	70.9197	57.6991	55.4965	67.6984	67.1993	62.3426	53.6422
Day 8	54.5854	52.8106	61.2331	55.328	60.1714	55.0388			64.0086	63.093	54.4706	60.381	57.957	61.9042			88.6088	79.3642	80.0391	86.4594	78.516				76.2983	46.4263	73.9685	46.1418	57.1524	58.5802	49.3521

## Sheet: Figure 2G
	MCM + GFP								MCM + NSP13								YAP 5SA + GFP								YAP 5SA + NSP13
Day 4	2.50474	2.85298	2.40571	2.58788	2.73738	2.94175			2.90892	2.45242	2.77395	2.92854	2.80168	3.2216			2.22608	2.66513	2.69405	2.62511	2.50573	2.66075			2.16231	1.86404	2.53362	2.52462	2.1438	2.02695	2.52434	2.94708
Day 8	2.41231	2.78936	2.42228	2.80995	2.73915	3.01153			2.61465	2.42206	2.94838	2.76432	2.81525	2.46283			0.940127	1.15824	1.57224	1.1252	1.56798				1.35797	2.04138	1.57602	2.25964	1.86374	2.5593	2.37347

## Sheet: sFigure 2A
Control	Flag-YAP 5SA 100ng	plus Lats2 WT 200ng	plus Lats2 KR 200ng	plus NSP2 400ng	plus NSP4 400ng	plus NSP5 400ng	plus NSP6 400ng	plus NSP7 400ng	plus NSP8 400ng	plus NSP9 400ng	plus NSP10 400ng	plus NSP12 400ng	plus NSP13 400ng	plus NSP15 400ng
0.66	2626.15	2580.74	2776.36	2675.52	2327.67	2552.07	2917.74	2073.6	2572.75	1760.84	1667.68	2330.81	554.88	2653.5
1.31	2677.06	2700.26	2901.49	2693.64	2281.79	3248.37	3453.28	2048.69	2625.07	1879.09	2204.77	2482.22	603	2612.46
1.03	2354.21	2331.49	2998.03	2200.9	2803.44	2621.08	2689.45	2604.52	2402.49	2500.29	2389.58	2399.03	893.31	2439.89

## Sheet: sFigure 2B
Control	Notch2 (NICD) 100ng	plus HA-NSP13 100ng	plus HA-NSP13 200ng	plus HA-NSP13 400ng
0.89	6.06	7.29	6.94	6.56
0.72	5.83	6.9	6.63	6.27
1.39	7.43	6.09	7.39	6.92

## Sheet: sFigure 2C
Control	Notch2 (NICD) 100ng	plus HA-NSP13 100ng	plus HA-NSP13 200ng	plus HA-NSP13 400ng
1.01	6.06	7.74	7.29	6.94
0.89	5.83	7.06	6.9	6.63
1.1	7.43	7.61	6.09	7.39

## Sheet: sFigure 2D
	MCM + GFP								MCM + NSP13								YAP 5SA + GFP								YAP 5SA + NSP13
Day 4	27.0143	24.6359	32.8079	33.7796	32.3005	29.8332			30.0301	33.4592	29.1425	27.71	29.4514	22.3073			33.1831	25.4047	29.4531	29.0392	28.4997	30.4424			36.2198	38.8932	29.657	28.1772	36.6995	36.1386	33.0067	27.3148
Day 8	27.4566	26.6814	32.0684	28.3245	31.6269	28.2941			34.4106	33.4535	27.8623	31.8213	30.1266	32.6161			56.347	45.4472	47.159	53.9549	45.5512				42.8734	22.0214	41.1615	22.0494	28.5668	30.327	24.0839

## Sheet: sFigure 2E
MCM/WT; GFP								MCM/WT; NSP13								MCM/5SA; GFP								MCM/5SA; NSP13
0.58	0.55	0.51	0.47	0.46	0.5			0.51	0.47	0.46	0.43	0.44	0.48			0.83	0.81	0.73	0.79					0.71	0.74	0.75	0.74	0.47	0.52	0.5	0.64

[truncated: 8 more sheets: Figure 3B, Figure 3D, Figure 3F, sFigure 3B, Figure 4G, sFigure 4H, sFigure 4I, RL-TK data]
